# Supplementary material
Source: PubMed Central journal article supplement (PMC6682733)
Supplement: supp_RA118.006985_142347_2_supp_344480_psqffy.pdf [file supp_RA118.006985_142347_2_supp_344480_psqffy.pdf]

**Supporting information for “LIM-domain transcription complexes interact with ring finger ubiquitin ligases to impact islet  $\beta$ -cell function” Wade and Liu et al.**

Three supplemental figures and one table.

**Figure S1.** (Related to Fig 1). **A.** Immunofluorescence staining of Rnf40 (red), Isl1 (yellow), and Ngn3 (green) in wild type E15.5 pancreas tissue. **B.** Immunofluorescence image of a wild type P1 islet serial section staining to demonstrate similar islet staining of Rnf40 (red, left) and SSBP3 (red, right), with insulin (green), and Isl1 (yellow). Scale bar (white) = 50 $\mu$ m.

**Figure S2.** (Related to Fig 4). Western blotting of indicated siRNA-treated rat Ins-1 cells demonstrating reduced histone H2B mono-ubiquitination in cells deficient on Rnf20, Rnf40, Isl1, and SSBP3. Duplicate siRNA knockdown transfections are shown. Approximate kDa protein sizes are shown to the right of each blot image. The black arrowhead points to the faster-migrating SSBP3-specific band, as opposed to the robust non-specific band, which we also observed in a prior study (22).

**Figure S3.** (Related to Fig 6). Relative mRNA quantification of various secretory effectors in control (siSCR-transfected, black bars, set to one-fold) and Rnf20-depleted (white bars) Min6 cells. Primer sequences provided upon request.

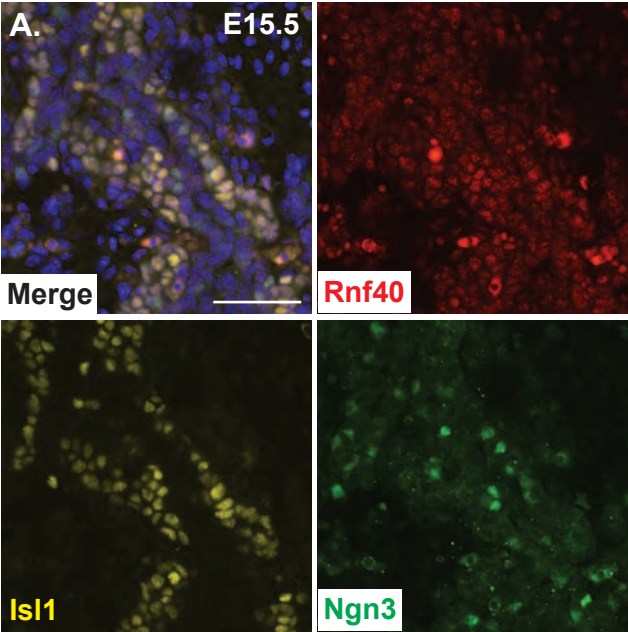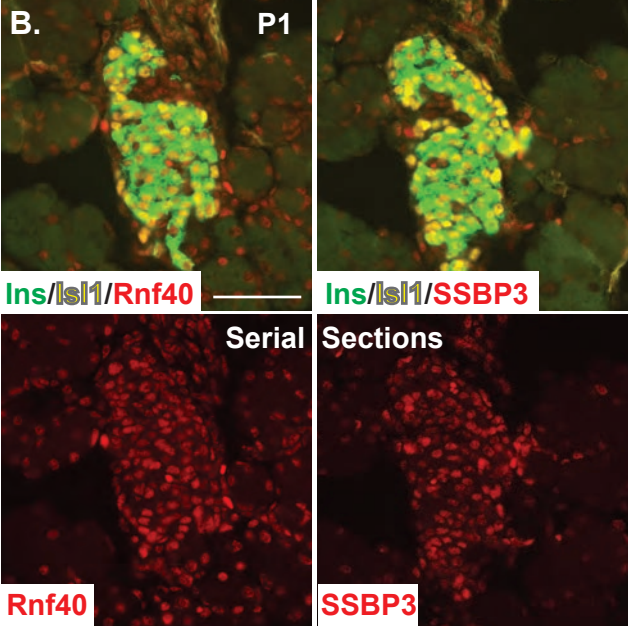

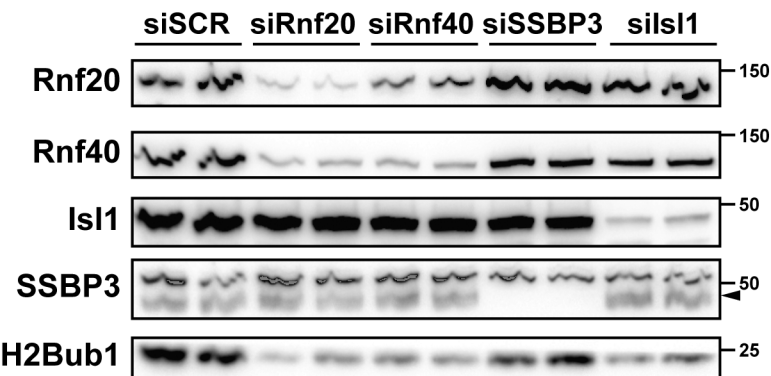

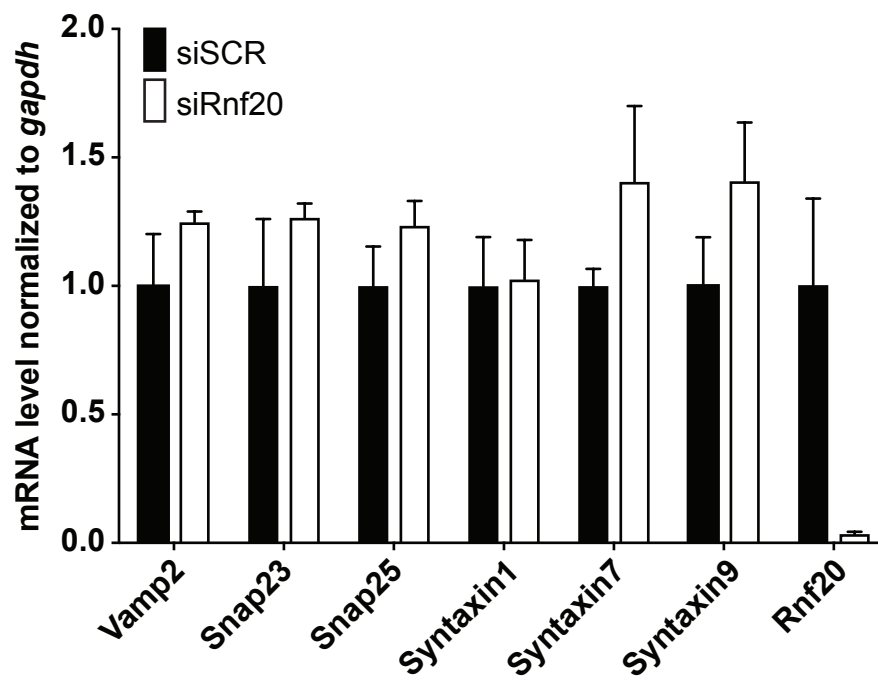

Table 1: Abbreviated ReCLIP/Mass Spectrometry Results – Comparing Isl1 and SSBP3 Interactions

| <b>Name</b>                                                                                           | <b>Description</b>          | <b>Isl1 Dataset</b> | <b>SSBP3 Dataset</b> |
|-------------------------------------------------------------------------------------------------------|-----------------------------|---------------------|----------------------|
| LIM Domain Binding Protein 1 (Ldb1)                                                                   | Co-regulator                | Yes                 | Yes                  |
| Single-Stranded Binding Protein 3 (SSBP3)                                                             | Co-regulator                | Yes                 | Yes                  |
| Single-Stranded DNA-Binding Protein 2 (SSBP2)                                                         | Co-regulator                | No                  | Yes                  |
| P53                                                                                                   | Tumor Suppressor            | Yes                 | No                   |
| BRE1A/Rnf20                                                                                           | E3 ubiquitin ligase complex | Yes                 | Yes                  |
| BRE1B/Rnf40                                                                                           | E3 ubiquitin ligase complex | Yes                 | No                   |
| Ubiquitin-Like Modifier-Activating Enzyme 1 (Uba1)                                                    | E1 Ubiquitin Ligase         | Yes                 | No                   |
| SMARCC1/ BAF155                                                                                       | SW1/SNF component           | Yes                 | No                   |
| SMARCC2/ BAF170                                                                                       | SW1/SNF component           | Yes                 | Yes                  |
| SW1/SNF-related matrix-associated actin-dependent regulator of chromatin subfamily E member 1 / BAF57 | SW1/SNF component           | No                  | Yes                  |
| Transcription Activator BRG1                                                                          | SW1/SNF component           | Yes                 | Yes                  |
| Transcription Intermediary Factor 1-beta (Tif-1beta)                                                  | NuRD component              | Yes                 | Yes                  |
| MYB-1b                                                                                                | NuRD component              | No                  | Yes                  |
| Myb-binding protein 1A                                                                                | HDAC                        | Yes                 | No                   |
| Matrin-3                                                                                              | Nuclear matrix protein      | Yes                 | Yes                  |
| RuvB-like 1                                                                                           | NuA4 HAT component          | No                  | Yes                  |
| RuvB-like 2                                                                                           | NuA4 HAT component          | Yes                 | Yes                  |
| Homeobox-Containing Protein 1 (Hmbox1)                                                                | Transcription Factor        | Yes                 | No                   |
| Cell Division Cycle 5-like Protein (CDC5L)                                                            | Cell Cycle Factor           | Yes                 | Yes                  |
| Cell Cycle and Apoptosis Regulator Protein 2                                                          | DBIRD component             | No                  | Yes                  |
|                                                                                                       |                             |                     |                      |
